# Supplementary material for: Generating evidence on a risk-based monitoring approach in the academic setting – lessons learned
Source: Springer Nature journal article supplement (doi:10.1186/s12874-017-0308-6), 2017-02-13

1a

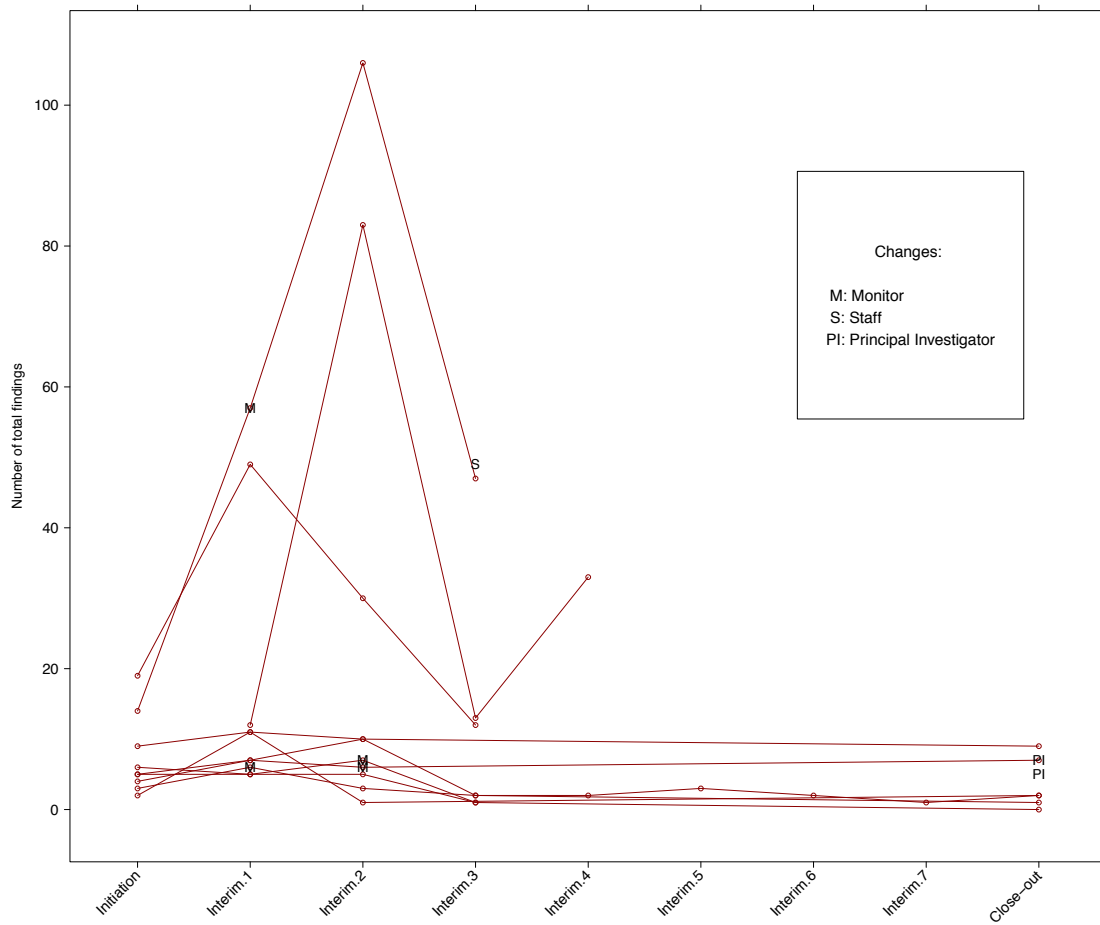

1b

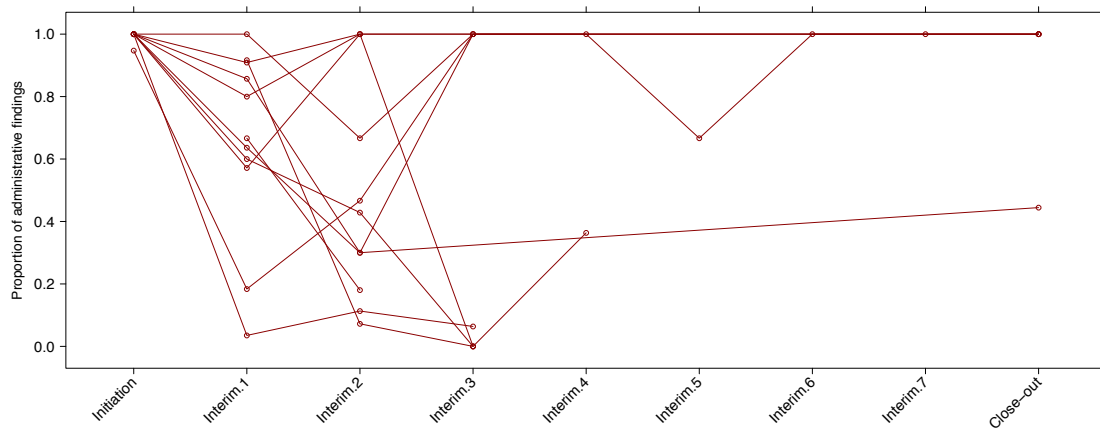

1c

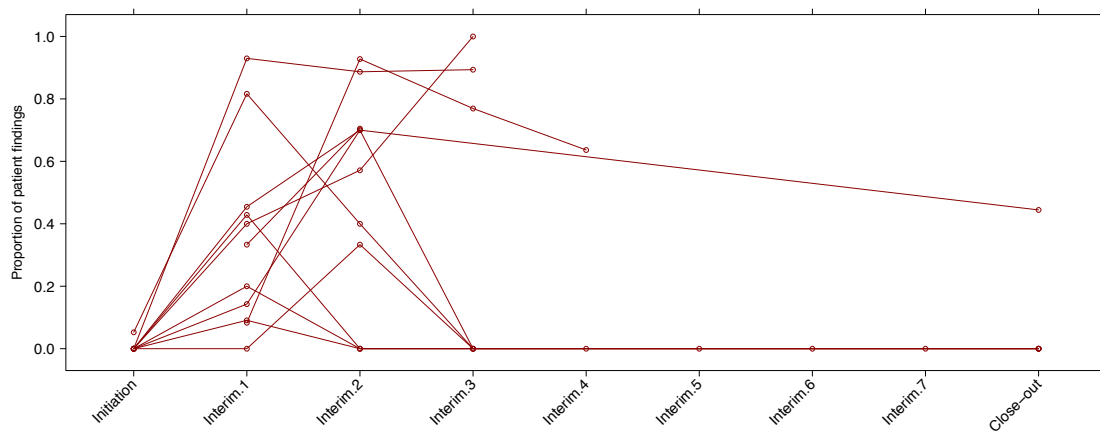

Supplement: MOESM1 [file 12066030]
